# Supplementary material
Source: ML conference proceedings conference paper supplement (https://openreview.net/forum?id=PalhNjBJqv)
Supplement: supplementary_material [file attachment]

## 1 Robot Prototype

The robot, as depicted in Figure 1, consists of a flexible backbone rigidly affixed to spacers, accompanied by four rods fixed at the end spacer and passing through the remaining spacers with sufficient clearance, forming the primary body of the robot.

To drive the robot, four brushless DC motors from Maxon Motors, equipped with quadratic encoders and 150:1 reduction gearheads, are utilized. Precise motor position control is achieved through four PID position controller modules (EPOS4 Compact 50/5 CAN), which receive encoder feedback and communicate with a PC using the CAN protocol to establish and retrieve controller set-points and configurations. Lead screws, connected to braided tubes via 3D printed connectors, are attached to the motors to convert motor power into tube-pulling and pushing actions. A schematic of the robot is shown in Figure 2.

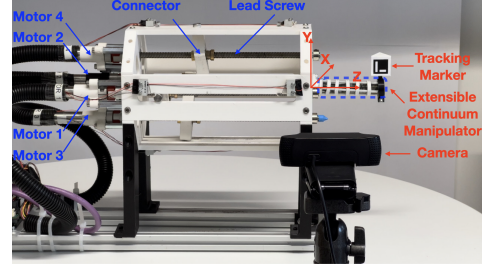

Figure 1: Prototype of the flexible robotic arm composed of a reinforced multi-backbone robot. The robot is connected to four brushless DC motors using lead screws. An ArUco marker [1, 2] is placed on the robot tip, and a camera is used to track the marker’s position.

## 2 Network Architecture and Training

Table 1 presents a summary of the hyperparameters and network structure. It should be noted that we employed an early-stopping technique to prevent overfitting when training the model. With early stopping, the model’s training is halted before it starts to overfit the training data, even if all iterations or epochs have not been completed. This allows the model to avoid memorizing the training data excessively and improves its ability to generalize to new, unseen data.

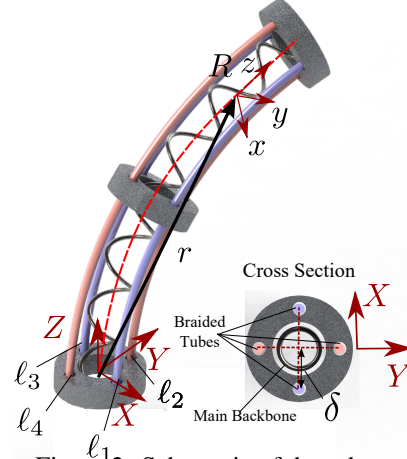

Figure 2: Schematic of the robot.

Table 1: Hyperparameters and network structure.

| Hyperparameter                    | value          |
|-----------------------------------|----------------|
| No. of hidden neuron ( $\theta$ ) | 112 (64,32,16) |
| Augmented vector size ( $p$ )     | 64             |
| No. of hidden layers              | 3              |
| Activation functions              | ELU            |
| Learning rate                     | 0.001          |
| Type of ode-solver                | fixed-adams    |
| Absolute tolerance for ode-solver | 1e-9           |
| Relative tolerance for ode-solver | 1e-7           |
| Number of iteration               | 7000           |

## 3 Controller Configuration

This section will provide the details of the controller configurations including its hyperparameters, running cost, and terminal cost functions.

The dynamics of the controlled system is captured by the trained FK model (augmented neural ODE model), while the running cost and terminal state cost are defined as follows:

- **Running cost:** our running cost function is composed of three costs and defined as follows:

$$\begin{aligned}
\text{cost\_tracking} &= w_{\text{tracking}} \cdot \|\mathbf{x} - \mathbf{x}_{\text{reference}}\|^2 \\
\text{cost\_obstacles} &= w_{\text{obstacle}} \cdot (d_1 < 0.01) + (d_2 < 0.01) \\
\text{cost\_jerk} &= w_{\text{jerk}} \cdot \|\mathbf{u} - \mathbf{u}_{\text{previous}}\|^2 \\
\text{cost\_affordance} &= w_{\text{affordance}} \cdot \text{affordance\_measure} \\
\text{running\_cost} &= \text{cost\_tracking} + \text{cost\_obstacle} + \text{cost\_jerk} + \text{cost\_affordance}
\end{aligned}$$

where  $\mathbf{x}$  represents the current state of the system,  $\mathbf{x}_{\text{reference}}$  is the corresponding state in the reference trajectory,  $\mathbf{u}$  denotes the current control input, and  $\mathbf{u}_{\text{previous}}$  represents the previous control input. The weights  $w_{\text{tracking}}$ ,  $w_{\text{obstacle}}$ , and  $w_{\text{jerk}}$  control the importance of each term in the overall cost function.  $w_{\text{affordance}}$  determines a suitable metric or measure that quantifies the affordance for the given task or goal. The first term penalizes the deviation of the reference trajectory. These deviations are weighted by a factor of 200, encouraging the system to closely follow the desired trajectory. The second term is a penalty term that considers the distance between the current states and two obstacle locations, denoted as  $d_1$  and  $d_2$ . If the distance to either obstacle is less than 0.01, a high penalty of 100,000 is added. This incentivizes the system to avoid approaching the obstacles too closely. To discourage jerky and abrupt movements, we considered another penalty term. This term penalizes high rates of change in acceleration or control inputs. In our implementation,  $w_{\text{jerk}}$  is set to 0.1.

- **Terminal cost:** our terminal cost is defined as:  $\text{terminal\_cost} = w_{\text{terminal}} \cdot \|\mathbf{x} - \mathbf{x}_{\text{goal}}\|^2$ , where  $w_{\text{terminal}}$  is the weighting factor that controls the importance of the terminal cost.

The  $\lambda$  parameter was set to 1 to balance the importance between the running cost and terminal state cost. The control inputs were constrained within the range defined by  $\text{umin} = [-0.01, -0.01, -0.01]$  and  $\text{umax} = [0.01, 0.01, 0.01]$ . Gaussian noise with a standard deviation of  $\text{noise\_sigma} = 0.001 \cdot \text{torch.eye}(3)$  was added to control samples for exploration. The MPPI optimization process involved generating 500 control samples per iteration, with a prediction horizon of 10 time steps. These parameter values were chosen to achieve effective control performance and can be fine-tuned for specific application requirements.

## 4 Affordance

In the context of robotics, an affordance is a relationship between an actor (i.e., robot), an action performed by the actor, an object on which this action is performed, and the observed effect [3]. The general idea of the affordance theory can be used in robotics to provide some information of mapping between objects, agents and the actions they can take on each other, as there is no unified formalization of it in robotics.

In our implementation, we incorporate a set of affordance terms (penalties for violating the motion restrictions) into the running cost of the controllers which can be selectively activated or deactivated by the operator, depending on the task phase. Thanks to the versatility of MPPI, which can handle non-convex running costs, allows us to effectively utilize these affordance terms for a more intuitive and context-aware interaction between the operator, the robot, and the environment, enabling more effective and efficient teleoperation. By adding the affordance measure to the running cost, we give more weight to actions that align with the desired affordance.

## References

- [1] S. Garrido-Jurado, R. M. noz Salinas, F. Madrid-Cuevas, and M. Marín-Jiménez. Automatic generation and detection of highly reliable fiducial markers under occlusion. *Pattern Recognition*, 47(6):2280 – 2292, 2014. ISSN 0031-3203. doi:<http://dx.doi.org/10.1016/j.patcog.2014.01.005>. URL <http://www.sciencedirect.com/science/article/pii/S0031320314000235>.

- 73 [2] S. Garrido-Jurado, R. M. noz Salinas, F. Madrid-Cuevas, and R. Medina-Carnicer. Generation of  
74 fiducial marker dictionaries using mixed integer linear programming. *Pattern Recognition*, 51:  
75 481 – 491, 2016. ISSN 0031-3203. doi:<http://dx.doi.org/10.1016/j.patcog.2015.09.023>. URL  
76 <http://www.sciencedirect.com/science/article/pii/S0031320315003544>.
- 77 [3] L. Montesano, M. Lopes, A. Bernardino, and J. Santos-Victor. Learning object affordances:  
78 from sensory–motor coordination to imitation. *IEEE Transactions on Robotics*, 24(1):15–26,  
79 2008.
